# Supplementary material
Source: PubMed Central journal article supplement (PMC3396449)
Supplement: supp_111.025353_ajcn025353-OSTables.pdf [file supp_111.025353_ajcn025353-OSTables.pdf]

## Online Supplemental Tables

This is the information on the foods/beverages consumed by the six individuals achieving <2300 mg sodium (among those who are recommended to consume less than 2300 mg of sodium) and  $\geq$ 4700 mg of potassium from NHANES 2003-2008.

| Person | Recall Day | Food description                                                          | Grams | Calories | Sodium (mg) | Potassium (mg) |
|--------|------------|---------------------------------------------------------------------------|-------|----------|-------------|----------------|
| 1      | 1          | Peanuts, not further specified (NFS)                                      | 37    | 219      | 117         | 265            |
| 1      | 1          | Papaya, dried                                                             | 69    | 178      | 14          | 1174           |
| 1      | 1          | Milk, cow's, fluid, 2% fat                                                | 336   | 168      | 138         | 503            |
| 1      | 1          | Soft drink, cola-type, sugar-free                                         | 355   | 7        | 28          | 28             |
| 1      | 1          | Lettuce, raw (include lettuce, NFS)                                       | 110   | 15       | 11          | 155            |
| 1      | 1          | Tomatoes, raw                                                             | 90    | 16       | 5           | 213            |
| 1      | 1          | Olive oil                                                                 | 14    | 119      | 0           | 0              |
| 1      | 1          | Oysters, canned                                                           | 41    | 30       | 49          | 101            |
| 1      | 1          | Bread, multigrain                                                         | 64    | 161      | 312         | 131            |
| 1      | 1          | Hard candy                                                                | 198   | 780      | 75          | 10             |
| 1      | 1          | Papaya, dried                                                             | 69    | 178      | 14          | 1174           |
| 1      | 1          | Wine, table, dry (including Burgundy, Claret, Rhine)                      | 207   | 173      | 10          | 204            |
| 1      | 1          | Peanuts, NFS                                                              | 292   | 1749     | 934         | 2120           |
| 1      | 2          | Milk, cow's, fluid, 2% fat                                                | 442   | 221      | 181         | 663            |
| 1      | 2          | Yogurt, plain, lowfat milk                                                | 227   | 143      | 159         | 531            |
| 1      | 2          | Chewing gum, NFS                                                          | 6     | 14       | 0           | 0              |
| 1      | 2          | Peanuts, roasted, w/o salt                                                | 102   | 593      | 6           | 696            |
| 1      | 2          | Papaya, dried                                                             | 68    | 176      | 14          | 1157           |
| 1      | 2          | Chewing gum, NFS                                                          | 6     | 14       | 0           | 0              |
| 1      | 2          | Tomatoes, raw                                                             | 123   | 22       | 6           | 292            |
| 1      | 2          | Lettuce, raw (include lettuce, NFS)                                       | 72    | 10       | 7           | 102            |
| 1      | 2          | Carrots, raw                                                              | 7     | 3        | 5           | 22             |
| 1      | 2          | Onions, mature, raw (include red onions, NFS)                             | 10    | 4        | 0           | 14             |
| 1      | 2          | Croutons                                                                  | 5     | 23       | 62          | 9              |
| 1      | 2          | Wine, table, dry (including Burgundy, Claret, Rhine)                      | 207   | 173      | 10          | 204            |
| 1      | 2          | Beef steak, broiled or baked, lean only                                   | 34    | 63       | 127         | 114            |
| 1      | 2          | Salsa, red, cooked, not homemade (including taco, creole, picante sauces) | 16    | 4        | 96          | 48             |
| 1      | 2          | Hard candy                                                                | 18    | 71       | 7           | 1              |

| Person | Recall Day | Food description                                        | Grams | Calories | Sodium (mg) | Potassium (mg) |
|--------|------------|---------------------------------------------------------|-------|----------|-------------|----------------|
| 2      | 1          | Milk, cow's, fluid, 2% fat                              | 885   | 442      | 363         | 1327           |
| 2      | 1          | Fruit juice drink, w/ vitamin b1, vitamin c + calcium   | 551   | 292      | 298         | 458            |
| 2      | 1          | Tea, leaf, unsweetened                                  | 252   | 3        | 8           | 93             |
| 2      | 1          | Sugar, white, granulated or lump                        | 13    | 49       | 0           | 0              |
| 2      | 1          | Pineapple, raw                                          | 310   | 155      | 3           | 338            |
| 2      | 1          | Milk, cow's, fluid, 2% fat                              | 885   | 442      | 363         | 1327           |
| 2      | 1          | Beef steak, broiled or baked, lean & fat                | 268   | 636      | 565         | 804            |
| 2      | 1          | Fruit juice, NFS (include mixed fruit juices)           | 188   | 87       | 5           | 290            |
| 2      | 1          | Pineapple, raw                                          | 310   | 155      | 3           | 338            |
| 2      | 1          | Milk, cow's, fluid, 2% fat                              | 885   | 442      | 363         | 1327           |
| 2      | 2          | Milk, cow's, fluid, 2% fat                              | 336   | 168      | 138         | 503            |
| 2      | 2          | Chocolate devil's food cake w/fudge and icing, homemade | 117   | 436      | 326         | 165            |
| 2      | 2          | Beef steak, broiled or baked, lean only                 | 201   | 367      | 439         | 702            |
| 2      | 2          | Lettuce, raw (include lettuce, NFS)                     | 55    | 8        | 6           | 78             |
| 2      | 2          | Tomatoes, raw                                           | 180   | 32       | 9           | 427            |
| 2      | 2          | Beef steak, broiled or baked, lean only                 | 201   | 367      | 439         | 702            |
| 2      | 2          | Lettuce, raw (include lettuce, NFS)                     | 41    | 6        | 4           | 58             |
| 2      | 2          | Tomatoes, raw                                           | 17    | 3        | 1           | 40             |
| 2      | 2          | Orange breakfast drink, calcium fortified               | 646   | 342      | 349         | 536            |
| 2      | 2          | Pineapple, raw                                          | 84    | 42       | 1           | 92             |
| 2      | 2          | Watermelon, raw                                         | 48    | 14       | 0           | 54             |
| 2      | 2          | Grapes, raw, ns as to type                              | 50    | 35       | 1           | 96             |
| 2      | 2          | Pineapple, raw                                          | 84    | 42       | 1           | 92             |
| 2      | 2          | Watermelon, raw                                         | 160   | 48       | 2           | 179            |
| 2      | 2          | Grapes, raw, ns as to type                              | 15    | 10       | 0           | 29             |
| 2      | 2          | Pineapple, raw                                          | 84    | 42       | 1           | 92             |
| 2      | 2          | Watermelon, raw                                         | 96    | 29       | 1           | 108            |
| 2      | 2          | Grapes, raw, ns as to type                              | 15    | 10       | 0           | 29             |
| 2      | 2          | Pineapple, raw                                          | 21    | 11       | 0           | 23             |
| 2      | 2          | Watermelon, raw                                         | 286   | 86       | 3           | 320            |
| 2      | 2          | Grapes, raw, ns as to type                              | 76    | 52       | 2           | 145            |
| 2      | 2          | Beef steak, broiled or baked, lean only                 | 101   | 184      | 219         | 351            |
| 2      | 2          | Tea, herbal (include sassafras, licorice)               | 518   | 5        | 5           | 47             |

| Person | Recall Day | Food description                                        | Grams | Calories | Sodium (mg) | Potassium (mg) |
|--------|------------|---------------------------------------------------------|-------|----------|-------------|----------------|
| 3      | 1          | Coffee, made from ground, regular                       | 1421  | 14       | 28          | 696            |
| 3      | 1          | Cream substitute, powdered                              | 16    | 85       | 28          | 127            |
| 3      | 1          | Sugar, white, granulated or lump                        | 50    | 195      | 0           | 1              |
| 3      | 1          | Ice cream, regular, not chocolate                       | 133   | 267      | 106         | 265            |
| 3      | 1          | Chocolate devil's food cake w/fudge and icing, homemade | 245   | 912      | 683         | 345            |
| 3      | 1          | Beef & veg (w/ carrots/dark green, no potato), no sauce | 91    | 126      | 152         | 222            |
| 3      | 1          | Beef w/ sweet & sour sauce (mixture)                    | 142   | 174      | 485         | 199            |
| 3      | 1          | Rice, brown, cooked, regular, ns fat added              | 146   | 161      | 7           | 62             |
| 3      | 1          | Fruit flavored drink, made from powdered mix            | 547   | 192      | 41          | 3              |
| 3      | 1          | Ice cream cone, no topping, not chocolate               | 78    | 166      | 65          | 151            |
| 3      | 1          | Chocolate devil's food cake w/fudge and icing, homemade | 245   | 912      | 683         | 345            |
| 3      | 1          | Beef steak, broiled or baked, lean only                 | 223   | 408      | 127         | 779            |
| 3      | 1          | Corn, yellow, cooked, from fresh, fat added             | 103   | 128      | 17          | 212            |
| 3      | 1          | Brussels sprouts, cooked, from frozen, fat added        | 176   | 108      | 56          | 494            |
| 3      | 1          | Orange juice, frozen (reconstituted with water)         | 1992  | 904      | 74          | 3832           |
| 3      | 1          | Ice cream cone, no topping, not chocolate               | 143   | 305      | 120         | 277            |
| 3      | 2          | Coffee, made from ground, regular                       | 533   | 5        | 11          | 261            |
| 3      | 2          | Cream substitute, powdered                              | 12    | 64       | 21          | 95             |
| 3      | 2          | Sugar, white, granulated or lump                        | 25    | 98       | 0           | 1              |
| 3      | 2          | Water, tap                                              | 1184  | 0        | 47          | 0              |
| 3      | 2          | Cookie, fig bar                                         | 64    | 223      | 224         | 132            |
| 3      | 2          | Banana, raw                                             | 118   | 105      | 1           | 422            |
| 3      | 2          | Brussels sprouts, cooked, ns as to form, fat added      | 176   | 99       | 67          | 494            |
| 3      | 2          | Rice, white, cooked, regular, no fat add in cooking     | 285   | 367      | 3           | 99             |
| 3      | 2          | Margarine-like spread, fat free, tub, salted            | 5     | 2        | 29          | 2              |
| 3      | 2          | Pork chop, broiled or baked, lean only                  | 258   | 537      | 165         | 1121           |
| 3      | 2          | Cookie, fig bar                                         | 32    | 111      | 112         | 66             |

| Person | Recall Day | Food description                                            | Grams | Calories | Sodium (mg) | Potassium (mg) |
|--------|------------|-------------------------------------------------------------|-------|----------|-------------|----------------|
| 4      | 1          | Cantaloupe (muskmelon), raw (include melon, NFS)            | 205   | 70       | 33          | 547            |
| 4      | 1          | Cocoa-flavored beverage powder w/ sugar, dry mix            | 59    | 236      | 106         | 274            |
| 4      | 1          | Roll, sweet, no topping, Mexican (pan dulce)                | 56    | 173      | 85          | 44             |
| 4      | 1          | Rice w/ vegetables, tomato-based sauce (mixture)            | 333   | 343      | 666         | 417            |
| 4      | 1          | Chicken or turkey w/ cream sauce (mixture)                  | 211   | 361      | 274         | 371            |
| 4      | 1          | Soft drink, fruit-flavored, caffeine free                   | 370   | 148      | 33          | 4              |
| 4      | 1          | Water, tap                                                  | 593   | 0        | 24          | 0              |
| 4      | 1          | Blueberries, raw                                            | 130   | 74       | 1           | 100            |
| 4      | 1          | Pizza, cheese, thin crust                                   | 81    | 246      | 471         | 142            |
| 4      | 1          | Pizza w/ pepperoni, thin crust                              | 83    | 266      | 563         | 153            |
| 4      | 1          | Mango nectar                                                | 453   | 231      | 23          | 109            |
| 4      | 1          | Milk, cow's, fluid, 2% fat                                  | 320   | 160      | 151         | 448            |
| 4      | 1          | Roll, sweet, no topping, Mexican (pan dulce)                | 56    | 173      | 85          | 44             |
| 4      | 1          | Banana, raw                                                 | 118   | 105      | 1           | 422            |
| 4      | 1          | Fruit salad (no citrus) w/ cream                            | 119   | 104      | 4           | 213            |
| 4      | 1          | Fruit salad (no citrus) w/ marshmallows                     | 112   | 121      | 18          | 176            |
| 4      | 2          | Banana, raw                                                 | 236   | 210      | 2           | 845            |
| 4      | 2          | Bread, wheat or cracked wheat                               | 52    | 138      | 271         | 96             |
| 4      | 2          | Jam preserves, marmalades, sweet w/ fruit juice concentrate | 40    | 73       | 10          | 200            |
| 4      | 2          | Orange juice, w/ calcium, can/bottle/carton, unsweetened    | 450   | 211      | 9           | 800            |
| 4      | 2          | Egg omelet or scrambled egg, w/ ham or bacon                | 158   | 325      | 840         | 315            |
| 4      | 2          | Pinto, calico/red/Mexican bean, dry, cooked, no fat         | 87    | 99       | 96          | 299            |
| 4      | 2          | Orange juice, w/ calcium, can/bottle/carton, unsweetened    | 450   | 211      | 9           | 800            |
| 4      | 2          | Tortilla, corn                                              | 72    | 157      | 32          | 134            |
| 4      | 2          | Pinto, calico/red/Mexican bean, dry, cooked, no fat         | 130   | 149      | 144         | 448            |
| 4      | 2          | Queso fresco (Hispanic-style farmer cheese)                 | 34    | 49       | 44          | 44             |
| 4      | 2          | Beef steak, fried, lean & fat                               | 134   | 381      | 295         | 505            |
| 4      | 2          | Soft drink, fruit-flavored, caffeine free                   | 370   | 148      | 33          | 4              |
| 4      | 2          | Tortilla, corn                                              | 72    | 157      | 32          | 134            |
| 4      | 2          | Water, tap                                                  | 311   | 0        | 12          | 0              |
| 4      | 2          | Milk, cow's, fluid, 2% fat                                  | 442   | 221      | 208         | 619            |
| 4      | 2          | Banana, raw                                                 | 236   | 210      | 2           | 845            |

| Person | Recall Day | Food description                                                     | Grams | Calories | Sodium (mg) | Potassium (mg) |
|--------|------------|----------------------------------------------------------------------|-------|----------|-------------|----------------|
| 5      | 1          | Coffee, decaffeinated, made from ground                              | 252   | 0        | 5           | 136            |
| 5      | 1          | Sugar substitute, saccharin-based, dry powder and tablets            | 1     | 4        | 4           | 0              |
| 5      | 1          | Cream substitute, light, liquid                                      | 45    | 31       | 27          | 80             |
| 5      | 1          | Yogurt, fruited, nonfat milk, low cal sweetener                      | 181   | 92       | 105         | 413            |
| 5      | 1          | Chicken/turkey loaf, prepack/deli, luncheon meat                     | 56    | 84       | 310         | 140            |
| 5      | 1          | Bread, wheat or cracked wheat                                        | 52    | 135      | 276         | 105            |
| 5      | 1          | Lettuce, raw (include lettuce, NFS)                                  | 16    | 2        | 2           | 23             |
| 5      | 1          | Soft drink, cola-type, sugar-free                                    | 355   | 7        | 28          | 28             |
| 5      | 1          | White potato, roasted, fat added                                     | 58    | 86       | 31          | 278            |
| 5      | 1          | Carrots, cooked, from fresh, fat added                               | 73    | 41       | 137         | 166            |
| 5      | 1          | Squash, summer, cooked, from fresh, fat added                        | 84    | 33       | 118         | 157            |
| 5      | 1          | Cabbage, green, cooked, fat added                                    | 70    | 31       | 105         | 66             |
| 5      | 1          | Beef stew w/ potatoes, gravy                                         | 252   | 252      | 260         | 708            |
| 5      | 1          | Soft drink, cola-type, sugar-free                                    | 355   | 7        | 28          | 28             |
| 5      | 1          | Cracker, ns as to sweet/non-sweet (NFS)                              | 15    | 75       | 127         | 20             |
| 5      | 1          | Tortilla, whole wheat                                                | 31    | 80       | 148         | 73             |
| 5      | 1          | Jicama, raw (include yambean)                                        | 195   | 74       | 8           | 293            |
| 5      | 1          | Milk, cow's, fluid, 2% fat                                           | 488   | 244      | 200         | 732            |
| 5      | 1          | Special k cereal                                                     | 23    | 88       | 168         | 46             |
| 5      | 1          | Strawberries, raw                                                    | 36    | 12       | 0           | 55             |
| 5      | 1          | Milk, cow's, fluid, 2% fat                                           | 153   | 76       | 63          | 229            |
| 5      | 1          | Cake, white, w/ icing, homemade                                      | 67    | 254      | 189         | 35             |
| 5      | 2          | Milk, cow's, fluid, 2% fat                                           | 320   | 160      | 131         | 480            |
| 5      | 2          | Beef steak, fried, lean only                                         | 201   | 462      | 472         | 981            |
| 5      | 2          | Pinto, calico/red/Mexican bean, dry, cooked, no fat                  | 87    | 99       | 95          | 299            |
| 5      | 2          | Bread, wheat or cracked wheat, toasted                               | 24    | 68       | 138         | 52             |
| 5      | 2          | Margarine-like spread, reduced calories,40% fat, made w/ yogurt, tub | 10    | 33       | 93          | 2              |
| 5      | 2          | Soft drink, cola-type, sugar-free                                    | 355   | 7        | 28          | 28             |
| 5      | 2          | Wine, table, dry (incl Burgundy, Claret, Rhine)                      | 148   | 124      | 7           | 146            |
| 5      | 2          | Flauta w/ beef                                                       | 452   | 1351     | 626         | 1200           |
| 5      | 2          | Sour cream, fat free                                                 | 85    | 63       | 120         | 110            |
| 5      | 2          | Avocado, raw                                                         | 201   | 322      | 14          | 975            |
| 5      | 2          | Lettuce, raw (include lettuce, NFS)                                  | 182   | 26       | 18          | 257            |
| 5      | 2          | Tomatoes, raw                                                        | 123   | 22       | 6           | 292            |
| 5      | 2          | Soft drink, cola-type, sugar-free                                    | 355   | 7        | 28          | 28             |
| 5      | 2          | Milk, cow's, fluid, 2% fat                                           | 442   | 221      | 181         | 663            |
| 5      | 2          | Yogurt, vanilla, lemon, coffee, nonfat milk, low cal sweet           | 245   | 105      | 145         | 434            |
| 5      | 2          | Grapes, raw, ns as to type                                           | 75    | 52       | 2           | 143            |

---

| Person | Recall Day | Food description                                   | Grams | Calories | Sodium (mg) | Potassium (mg) |
|--------|------------|----------------------------------------------------|-------|----------|-------------|----------------|
| 6      | 1          | Protein supplement, powdered                       | 23    | 86       | 152         | 88             |
| 6      | 1          | Water as an ingredient                             | 237   | 0        | 9           | 0              |
| 6      | 1          | Banana, raw                                        | 118   | 105      | 1           | 422            |
| 6      | 1          | Eggs, whole, boiled                                | 130   | 201      | 161         | 163            |
| 6      | 1          | Salmon, baked or broiled                           | 34    | 50       | 29          | 139            |
| 6      | 1          | Orange, raw                                        | 131   | 62       | 0           | 237            |
| 6      | 1          | Tea, leaf, unsweetened                             | 1776  | 18       | 53          | 657            |
| 6      | 1          | Pumpkin & squash seeds, hulled, roasted, no salt   | 14    | 74       | 3           | 114            |
| 6      | 1          | Fig, dried, uncooked                               | 19    | 47       | 2           | 129            |
| 6      | 1          | Banana, raw                                        | 101   | 90       | 1           | 362            |
| 6      | 1          | Rice, brown, cooked, regular, fat added in cooking | 74    | 94       | 4           | 31             |
| 6      | 1          | Haddock, baked or broiled                          | 34    | 46       | 27          | 126            |
| 6      | 1          | Beets, cooked, from fresh, fat not added           | 170   | 74       | 131         | 516            |
| 6      | 1          | Broccoli, cooked, from fresh, no fat added         | 156   | 54       | 64          | 454            |
| 6      | 1          | Cantaloupe (muskmelon), raw (include melon, NFS)   | 205   | 70       | 33          | 547            |
| 6      | 1          | Strawberries, raw                                  | 126   | 40       | 1           | 193            |
| 6      | 1          | Water, bottled, unsweetened                        | 710   | 0        | 14          | 0              |
| 6      | 1          | Banana, raw                                        | 118   | 105      | 1           | 422            |
| 6      | 1          | Apple, raw                                         | 138   | 72       | 1           | 148            |
| 6      | 1          | Almond butter                                      | 48    | 304      | 216         | 364            |
| 6      | 1          | Olives, black                                      | 20    | 21       | 179         | 2              |
| 6      | 1          | Protein supplement, powdered                       | 23    | 86       | 152         | 88             |
| 6      | 1          | Water as an ingredient                             | 237   | 0        | 9           | 0              |
| 6      | 1          | Blueberries, raw                                   | 148   | 84       | 1           | 114            |
| 6      | 2          | Protein supplement, powdered                       | 23    | 86       | 152         | 88             |
| 6      | 2          | Water as an ingredient                             | 237   | 0        | 9           | 0              |
| 6      | 2          | Banana, raw                                        | 118   | 105      | 1           | 422            |
| 6      | 2          | Eggs, whole, boiled                                | 130   | 201      | 161         | 163            |
| 6      | 2          | Salmon, smoked (include lox)                       | 57    | 66       | 445         | 99             |
| 6      | 2          | Orange, raw                                        | 131   | 62       | 0           | 237            |
| 6      | 2          | Tea, leaf, unsweetened                             | 1006  | 10       | 30          | 372            |
| 6      | 2          | Pumpkin & squash seeds, hulled, roasted, salted    | 7     | 37       | 41          | 57             |
| 6      | 2          | Fig, dried, uncooked                               | 19    | 47       | 2           | 129            |
| 6      | 2          | Banana, raw                                        | 118   | 105      | 1           | 422            |
| 6      | 2          | Water, bottled, unsweetened                        | 1402  | 0        | 28          | 0              |
| 6      | 2          | Tuna, fresh, baked or broiled                      | 21    | 33       | 17          | 111            |
| 6      | 2          | Squash, winter, baked, no fat or sugar added       | 103   | 38       | 1           | 246            |
| 6      | 2          | Bean salad, yellow &/or green string beans         | 75    | 57       | 298         | 126            |

|   |   |                                                    |     |     |   |     |
|---|---|----------------------------------------------------|-----|-----|---|-----|
| 6 | 2 | Rice, brown, cooked, regular, fat added in cooking | 98  | 125 | 5 | 41  |
| 6 | 2 | Banana, raw                                        | 118 | 105 | 1 | 422 |

| Person | Recall Day | Food description             | Grams | Calories | Sodium (mg) | Potassium (mg) |
|--------|------------|------------------------------|-------|----------|-------------|----------------|
| 6      | 2          | Almond butter                | 32    | 203      | 144         | 243            |
| 6      | 2          | Apple, raw                   | 138   | 72       | 1           | 148            |
| 6      | 2          | Fig, dried, uncooked         | 19    | 47       | 2           | 129            |
| 6      | 2          | Protein supplement, powdered | 23    | 86       | 152         | 88             |
| 6      | 2          | Water as an ingredient       | 237   | 0        | 9           | 0              |
| 6      | 2          | Banana, raw                  | 118   | 105      | 1           | 422            |
| 6      | 2          | Raspberries, red, raw        | 123   | 64       | 1           | 186            |
